# Supplementary material for: Inhibition of glutamine metabolism counteracts pancreatic cancer stem cell features and sensitizes cells to radiotherapy
Source: PubMed Central journal article supplement (PMC4741594; doi:10.18632/oncotarget.5150), 2015-09-03
Supplement: oncotarget-06-31151-s001.pdf [file oncotarget-06-31151-s001.pdf]

SUPPLEMENTARY FIGURES AND TABLES

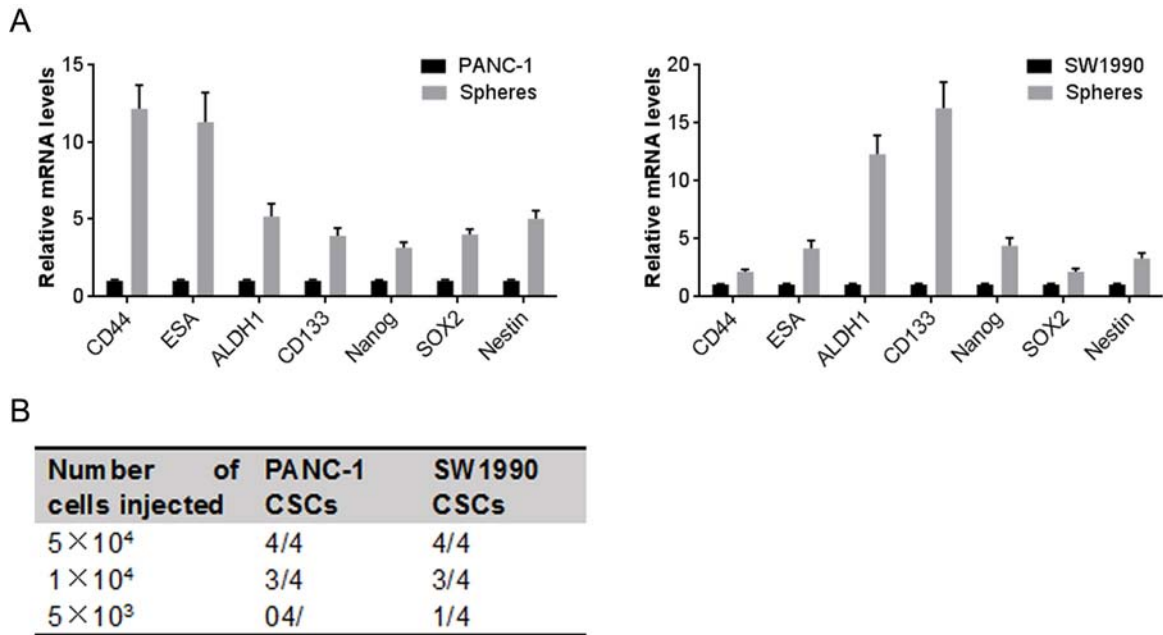

Supplementary Figure S1: A. Relative mRNA expression of stemness-related genes (normalized to GAPDH) in PANC-1 (left panel) and SW1990 cells (right panel) as evaluated by qRT-PCR (spheres vs. parental cell line). B. Indicated numbers of spheroids cells were injected subcutaneously into nude mice, and the tumorigenicity rates are shown.

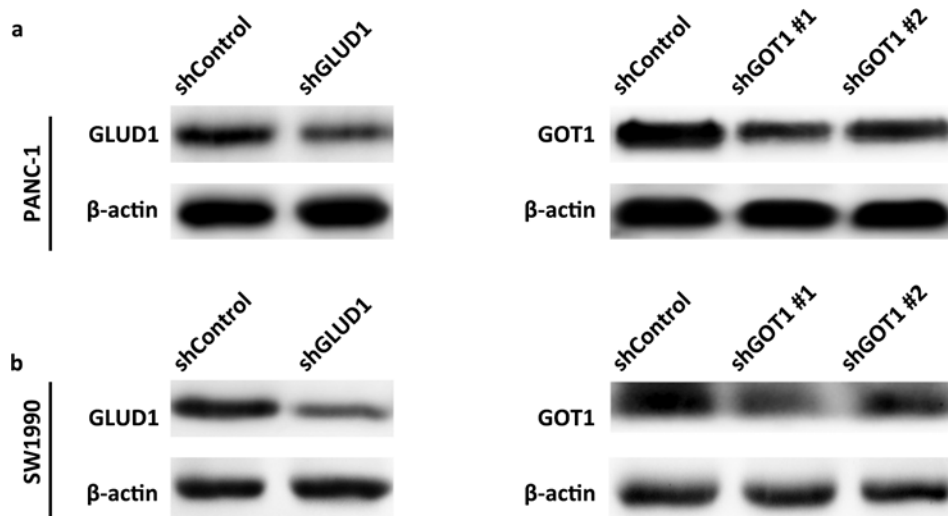

**Supplementary Figure S2: A. Knockdown efficiencies of shRNA against GLUD1 and GOT1 in PANC-1 cells. B. Knockdown efficiencies of shRNA against GLUD1 and GOT1 in SW1990 cells.**

**Supplementary Table S1: The sequences of PCR primers**

|       |                |     |                            |     |
|-------|----------------|-----|----------------------------|-----|
| ALDH1 | Forward Primer | 5'- | GTT CCT GGT TAT GGG CCT AC | -3' |
|       | Reverse Primer | 5'- | CCT GGA TGC GGC TAT ACA AC | -3' |
| CD133 | Forward Primer | 5'- | GGTCTGGCGAGCTAAGGGAA       | -3' |
|       | Reverse Primer | 5'- | GGGGAAGGCAAGCGTGTT         | -3' |
| CD44  | Forward Primer | 5'- | TTTGCATTGCAGTCAACAGTC      | -3' |
|       | Reverse Primer | 5'- | GTTACACCCCAATCTTCATGTCCAC  | -3' |
| ESA   | Forward Primer | 5'- | ACCTGCTCTGAGCGAGTGAGAACCT  | -3' |
|       | Reverse Primer | 5'- | GACCAGGATCCAGATCCAGTTG     | -3' |
| GLS1  | Forward Primer | 5'- | GCTTTCCATGTTGGTCTTCC       | -3' |
|       | Reverse Primer | 5'- | AAACAAGATCGTGACAAAAGTGAA   | -3' |
| GLUD1 | Forward Primer | 5'- | GGGATTCTAACTACCACTTGCTCA   | -3' |
|       | Reverse Primer | 5'- | AACTCTGCCGTGGGTACAAT       | -3' |
| GOT1  | Forward Primer | 5'- | CAACTGGGATTGACCCAACT       | -3' |
|       | Reverse Primer | 5'- | GGAACAGAAACCGGTGCTT        | -3' |
| GOT2  | Forward Primer | 5'- | GGATCTGGAGGTCCCATTTTC      | -3' |
|       | Reverse Primer | 5'- | ATGGCCCTGCTGCACTC          | -3' |
| MDH1  | Forward Primer | 5'- | TAAGGTTATCGTGGTGGG         | -3' |
|       | Reverse Primer | 5'- | TGCTTTAGCTCGGTTGTG         | -3' |
| ME1   | Forward Primer | 5'- | GTTGCCCTTGGTGTGT           | -3' |
|       | Reverse Primer | 5'- | GGATAAATGGTGGCTGTC         | -3' |
| Nanog | Forward Primer | 5'- | TCCAGCAGATGCAAGAACTCTCCA   | -3' |
|       | Reverse Primer | 5'- | CACACCATTGCTATTCTTCGGCCA   | -3' |
| SOX2  | Forward Primer | 5'- | ATGACCAGCTCGCAGACCTAC      | -3' |
|       | Reverse Primer | 5'- | TTGACCACCGAACCCATGGAG      | -3' |
